# Supplementary material for: Cationic metal–organic framework with charge separation effect as a high output triboelectric nanogenerator material for self-powered anticorrosion
Source: Royal Society of Chemistry journal article supplement (doi:10.1039/d3dt02185h), 2023-01-01
Supplement: d3dt02185h1.pdf [file d3dt02185h1.pdf]

# **Cationic metal-organic framework with charge separation effect as a high output triboelectric nanogenerator material for self-powered anticorrosion**

Zhichao Shao,<sup>\*a</sup> Haoran Cheng,<sup>a</sup> Yi Wei,<sup>b</sup> Junshuai Chen,<sup>a</sup> Kexin Gao,<sup>a</sup> Zhe Fang,<sup>a</sup> Yangshuang Yan,<sup>a</sup> Liwei Mi<sup>\*a</sup> and Hongwei Hou<sup>\*b</sup>

[<sup>a</sup>] Center for Advanced Materials Research, Zhongyuan University of Technology, Zhengzhou, 450007, P. R. China.

[<sup>b</sup>] College of Chemistry, Zhengzhou University, Zhengzhou, Henan, 450001, P. R. China.

E-mail address: [shaozhichao@zut.edu.cn](mailto:shaozhichao@zut.edu.cn), [mlwzzu@163.com](mailto:mlwzzu@163.com),  
[huhongw@zzu.edu.cn](mailto:huhongw@zzu.edu.cn)

## Supporting Information

**Fig. S1** Chemical structure of ZUT-iMOF-1(Cu).

**Fig. S2** UV absorption spectra of ZUT-iMOF-1(Cu).

**Fig. S3** XPS spectra of ZUT-iMOF-1(Cu).

**Fig. S4** PXRD spectra of ZUT-iMOF-1(Cu).

**Fig. S5** IR spectra of ZUT-iMOF-1(Cu).

**Fig. S6** Water contact angle of ZUT-iMOF-1(Cu).

**Fig. S7** Zeta potential of ZUT-iMOF-1(Cu).

**Fig. S8** N<sub>2</sub> adsorption and desorption isotherms of ZUT-iMOF-1(Cu).

**Fig. S9**  $I_{SC}$  of iMOF-TENG at 1 Hz.

**Fig. S10**  $I_{SC}$  of iMOF-TENG at 2 Hz.

**Fig. S11**  $I_{SC}$  of iMOF-TENG at 4 Hz.

**Fig. S12**  $I_{SC}$  of iMOF-TENG at 5 Hz.

**Fig. S13**  $I_{SC}$  of iMOF-TENG at 6 Hz.

**Fig. S14**  $I_{SC}$  of iMOF-TENG at 8 Hz.

**Fig. S15**  $V_0$  of iMOF-TENG from 1 Hz to 8 Hz.

**Fig. S16**  $V_0$  of iMOF-TENG at 1 Hz.

**Fig. S17**  $V_0$  of iMOF-TENG at 2 Hz.

**Fig. S18**  $V_0$  of iMOF-TENG at 4 Hz.

**Fig. S19**  $V_0$  of iMOF-TENG at 5 Hz.

**Fig. S20**  $V_0$  of iMOF-TENG at 6 Hz.

**Fig. S21**  $V_0$  of iMOF-TENG at 8 Hz.

**Fig. S22** SEM images of ZUT-iMOF-1(Cu) on the Cu layer (a) before and (b) after

**Fig. S23** SEM-EDS mapping analysis image of ZUT-iMOF-1(Cu) before testing.

**Fig. S24** SEM-EDS mapping analysis image of ZUT-iMOF-1(Cu) after testing.

**Fig. S25** PXRD spectra of ZUT-iMOF-1(Cu) before and after testing.

**Fig. S26** Tauc plots of ZUT-iMOF-1(Cu).

**Fig. S27** Mott-Schottky plots of ZUT-iMOF-1(Cu).

**Fig. S28** Working mechanism of TENG based on iMOF-TENG.

**Fig. S29** Commercial LED lights lit by iMOF-TENG.

**Table S1** Crystallographic data and structure refinement details for ZUT-iMOF-1(Cu).

**Table S2** Selected bond lengths (Å) and bond angles (deg) for ZUT-iMOF-1(Cu). crystal structure description.

**Table S3** Electrochemical parameters of carbon steel obtained from polarization curves with and without TENG.

**Table S4** Resistance fitting parameters of carbon steel with and without TENG.

**Table S5** Output performance comparison of different materials-based TENGs

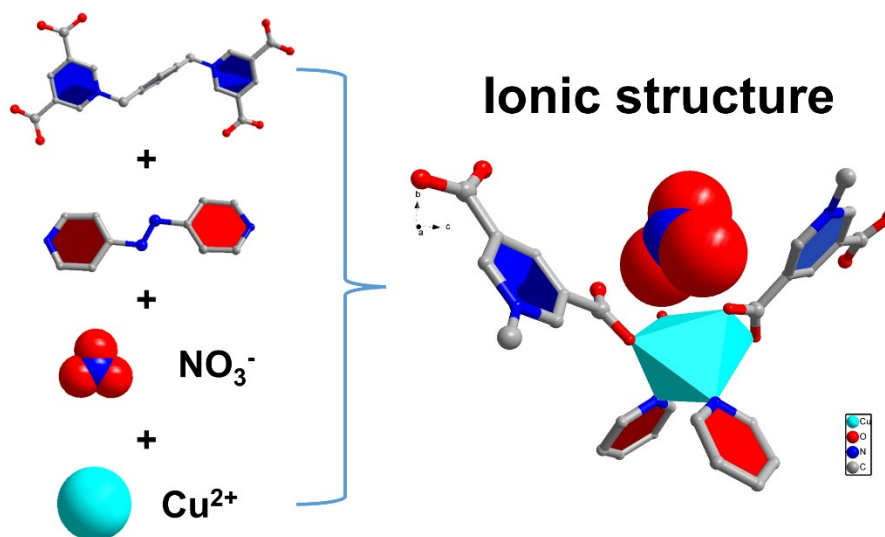

Fig. S1 Chemical structure of ZUT-iMOF-1(Cu).

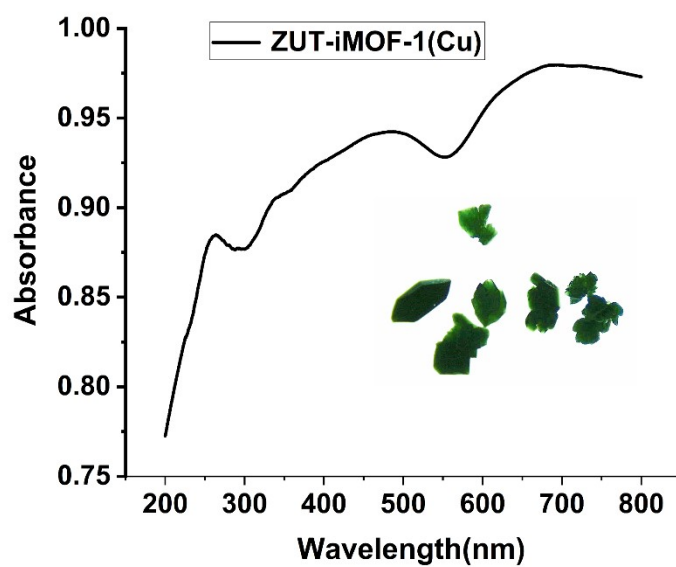

Fig. S2 UV absorption spectra of ZUT-iMOF-1(Cu).

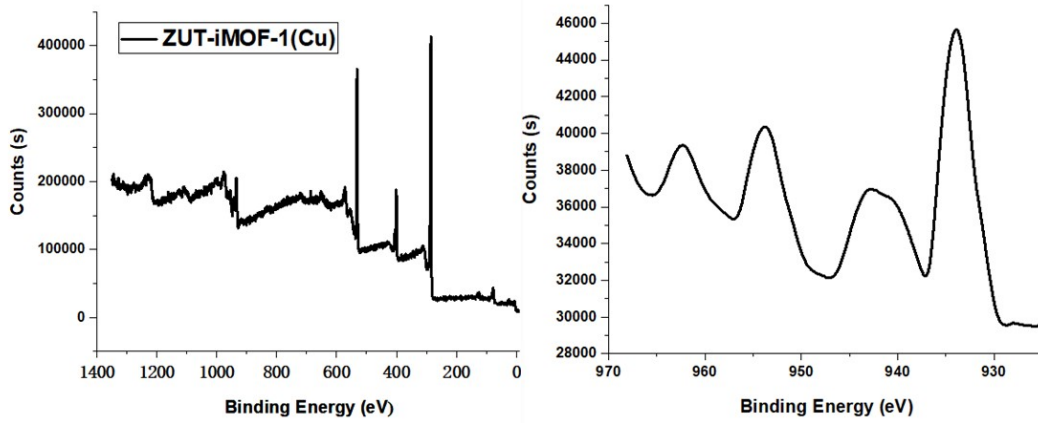

Fig. S3 XPS spectra of ZUT-iMOF-1(Cu).

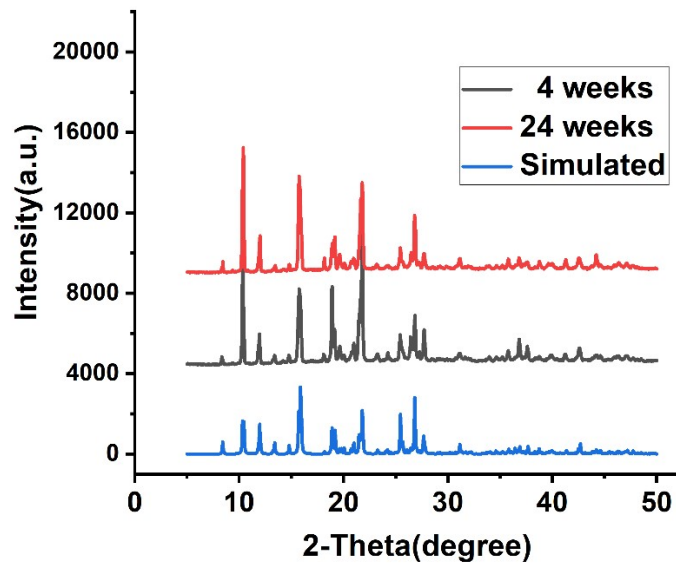

Fig. S4 PXRD spectra of ZUT-iMOF-1(Cu).

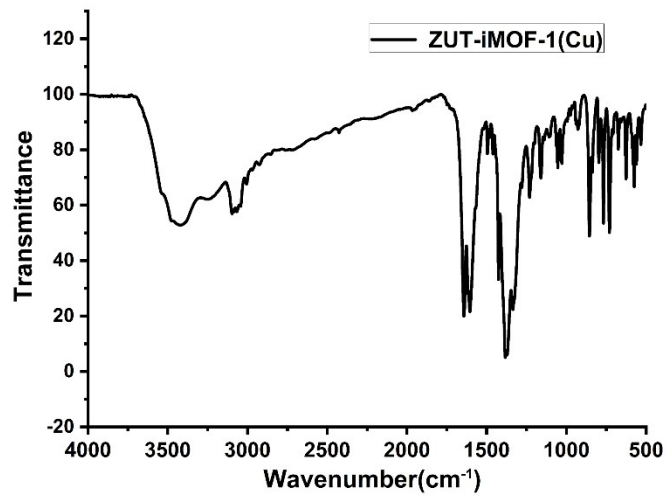

Fig. S5 IR spectra of ZUT-iMOF-1(Cu).

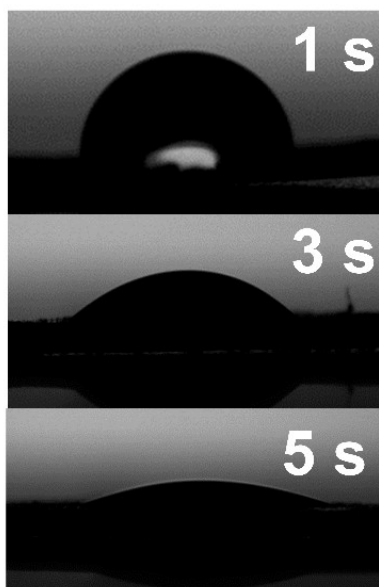

**Fig. S6** Water contact angle of ZUT-iMOF-1(Cu).

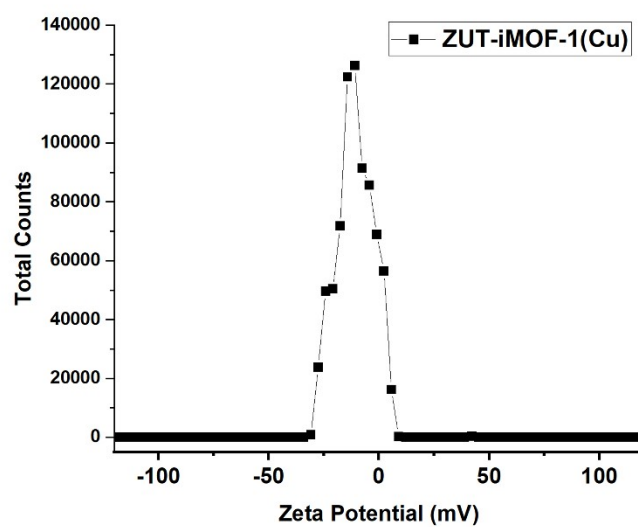

**Fig. S7** Zeta potential of ZUT-iMOF-1(Cu).

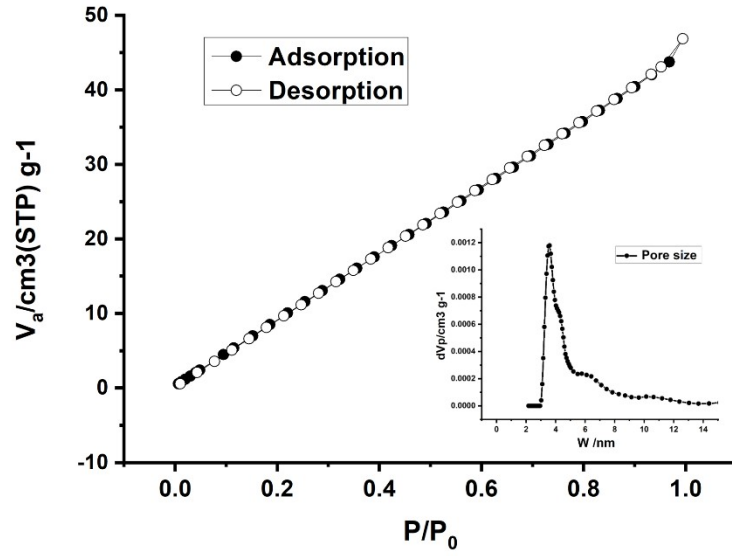

Fig. S8  $\text{N}_2$  adsorption and desorption isotherms of ZUT-iMOF-1(Cu).

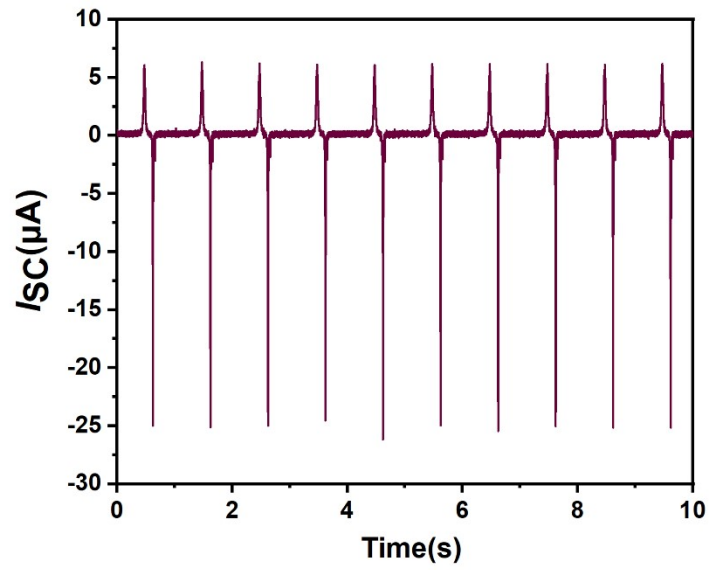

Fig. S9  $I_{sc}$  of iMOF-TENG at 1 Hz.

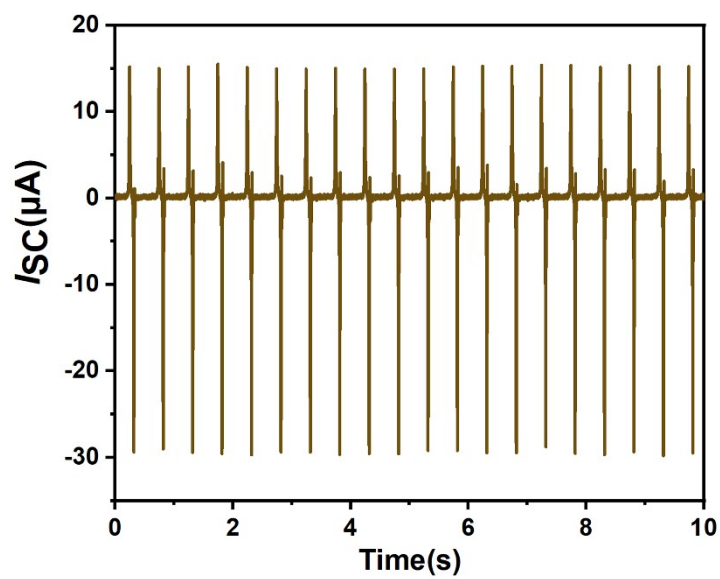

Fig. S10  $I_{SC}$  of iMOF-TENG at 2 Hz.

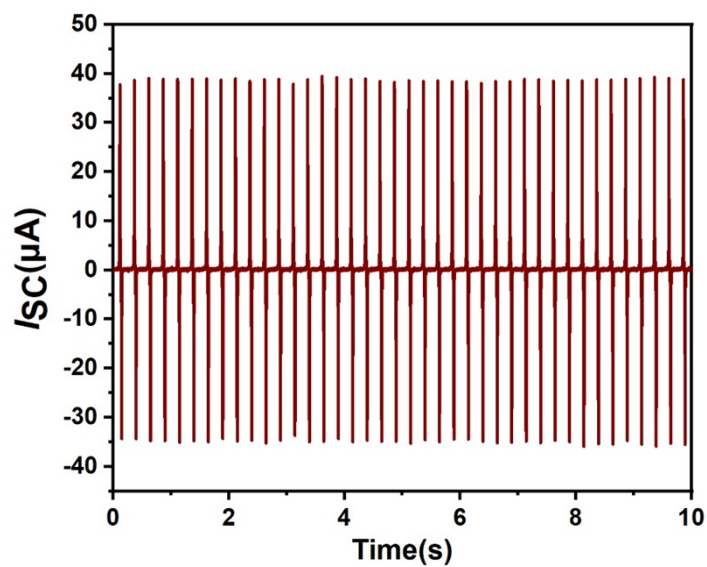

Fig. S11  $I_{SC}$  of iMOF-TENG at 4 Hz.

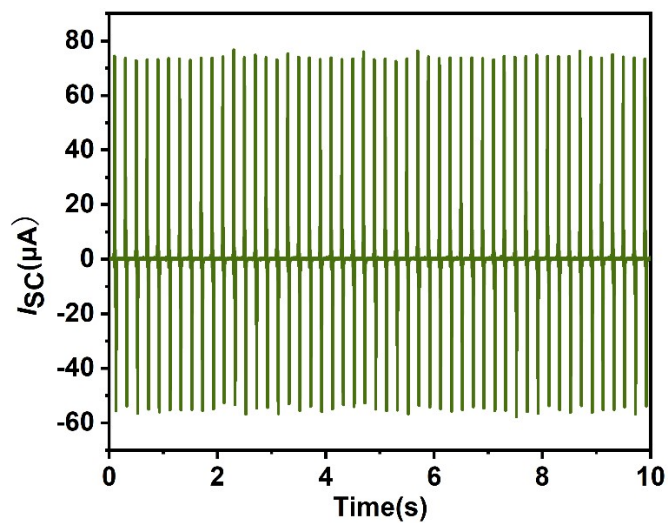

**Fig. S12**  $I_{SC}$  of iMOF-TENG at 5 Hz.

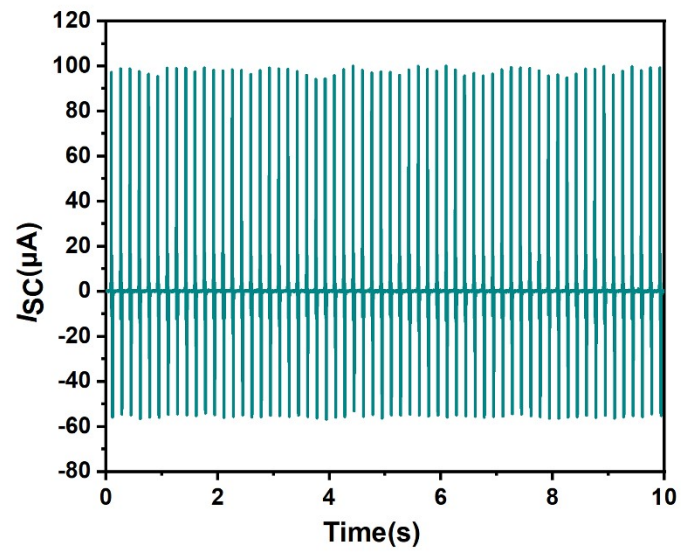

**Fig. S13**  $I_{SC}$  of iMOF-TENG at 6 Hz.

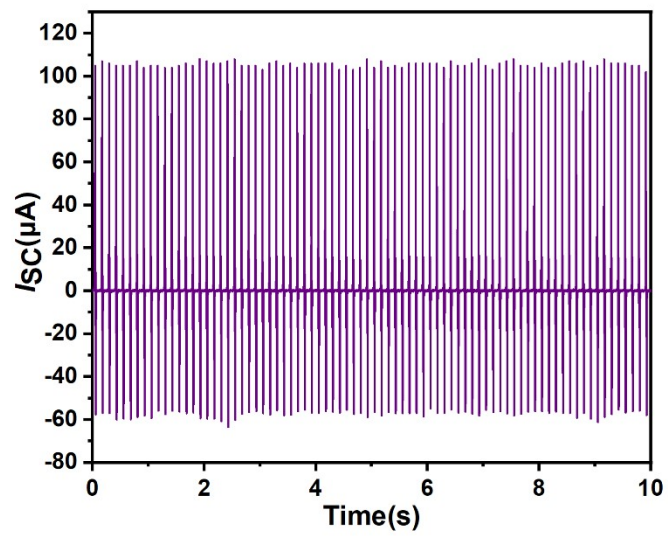

**Fig. S14**  $I_{SC}$  of iMOF-TENG at 8 Hz.



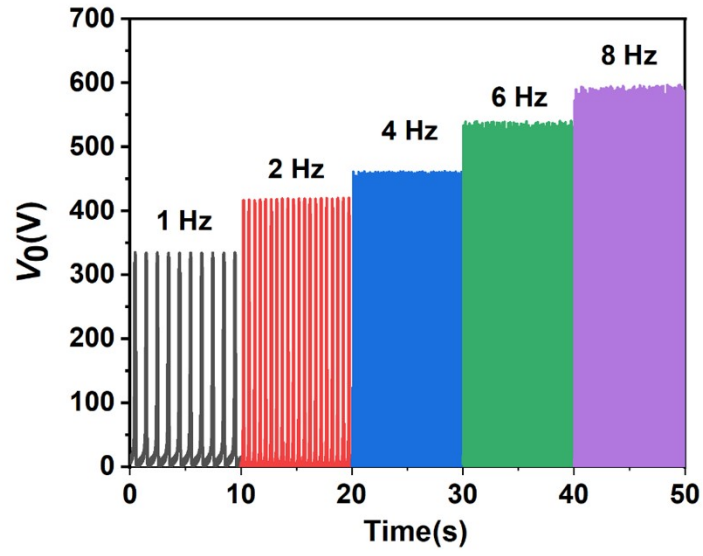

Fig. S15  $V_0$  of iMOF-TENG from 1 Hz to 8 Hz.

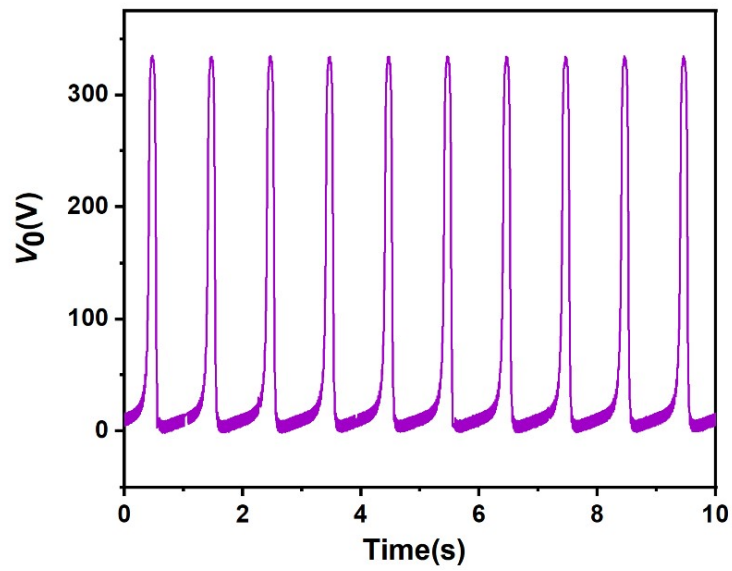

Fig. S16  $V_0$  of iMOF-TENG at 1 Hz.

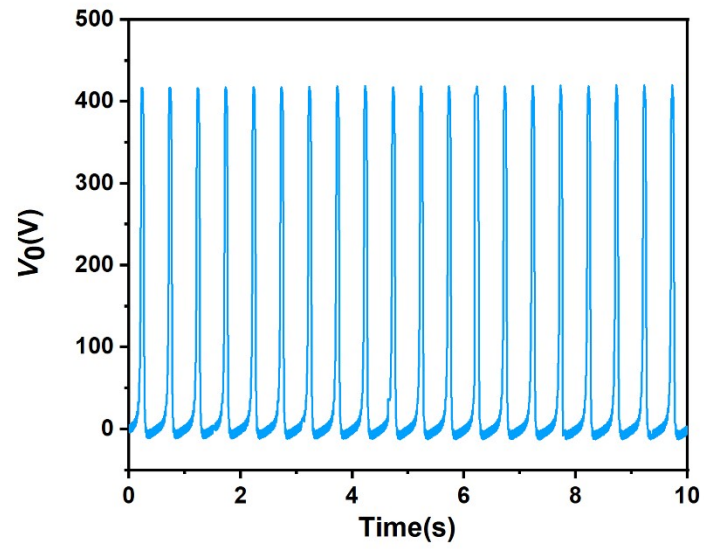

Fig. S17  $V_0$  of iMOF-TENG at 2 Hz.

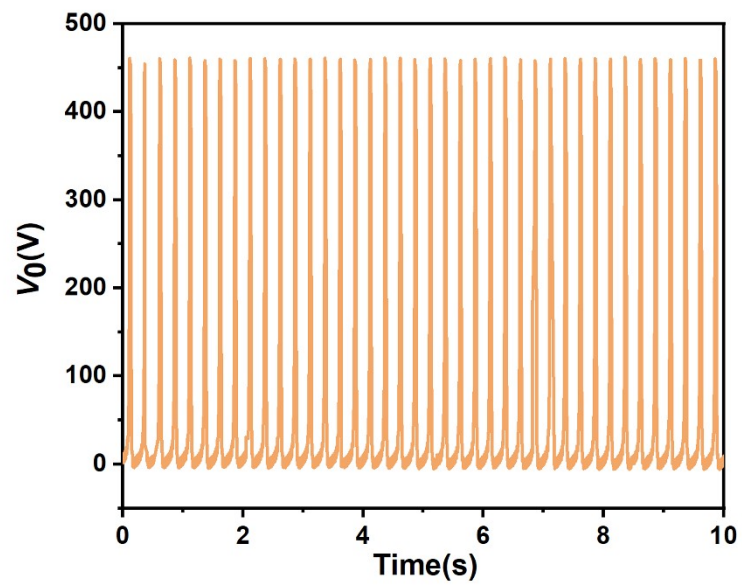

Fig. S18  $V_0$  of iMOF-TENG at 4 Hz.

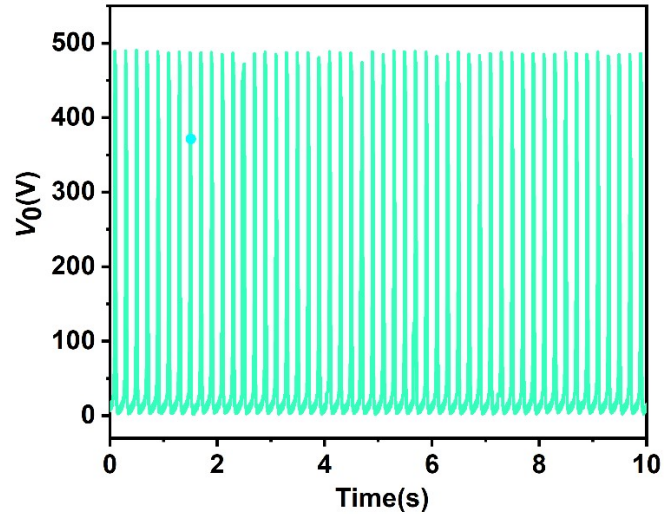

Fig. S19  $V_0$  of iMOF-TENG at 5 Hz.

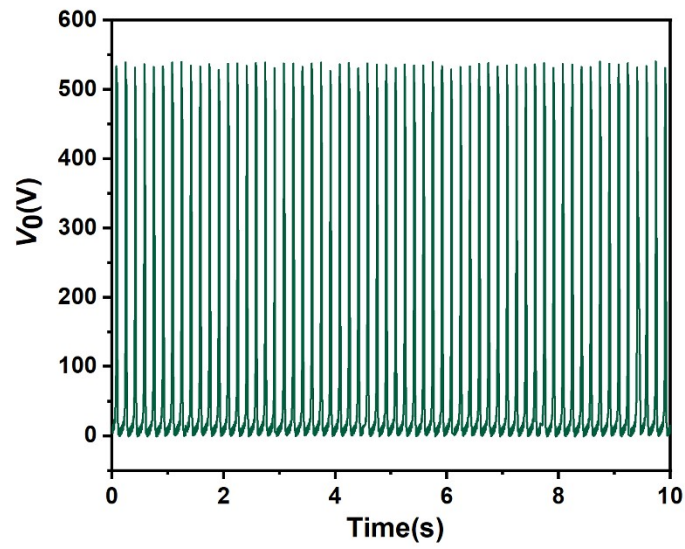

Fig. S20  $V_0$  of iMOF-TENG at 6 Hz.

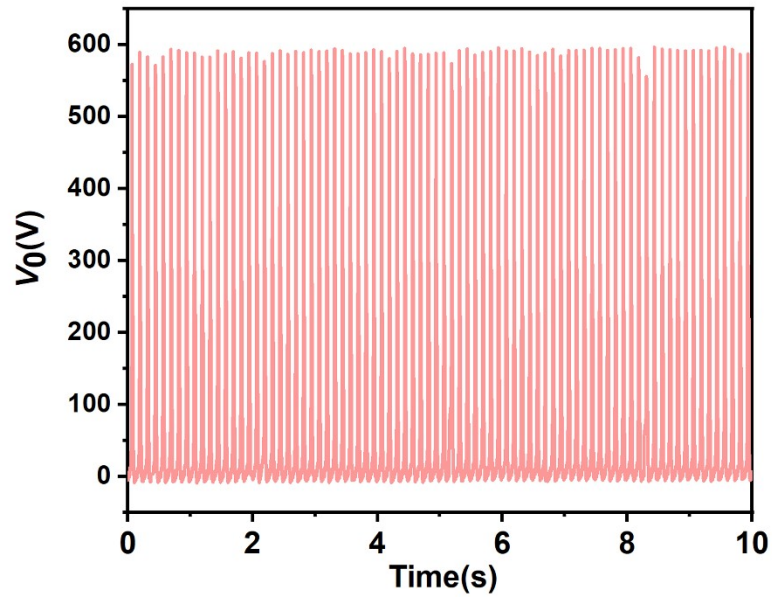

**Fig. S21**  $V_0$  of iMOF-TENG at 8 Hz.

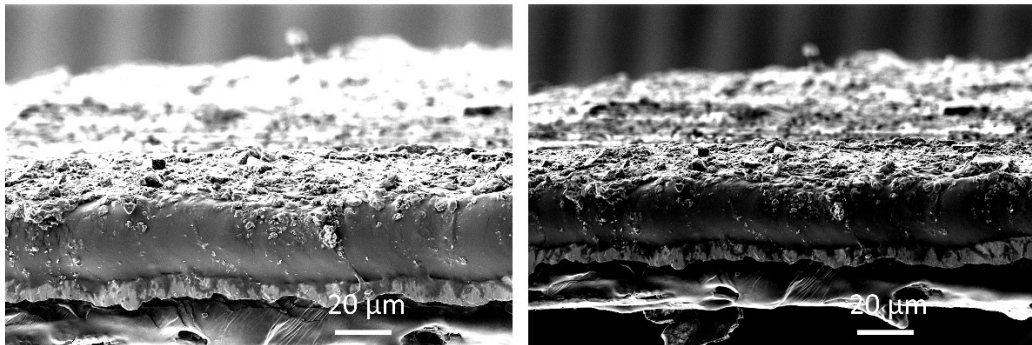

**Fig. S22** SEM images of ZUT-iMOF-1(Cu) on the Cu layer (a) before and (b) after testing.

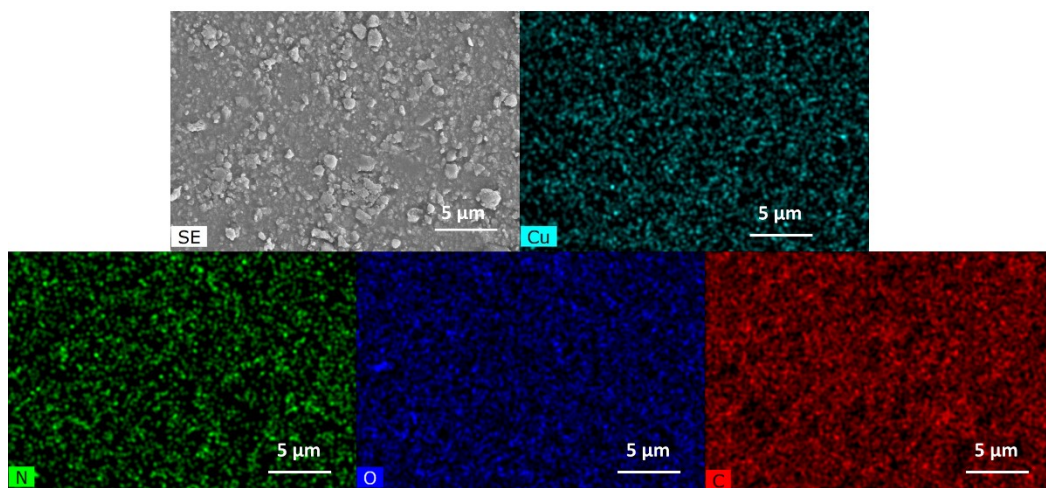

**Fig. S23** SEM-EDS mapping analysis image of ground powder of ZUT-iMOF-1(Cu) before testing.

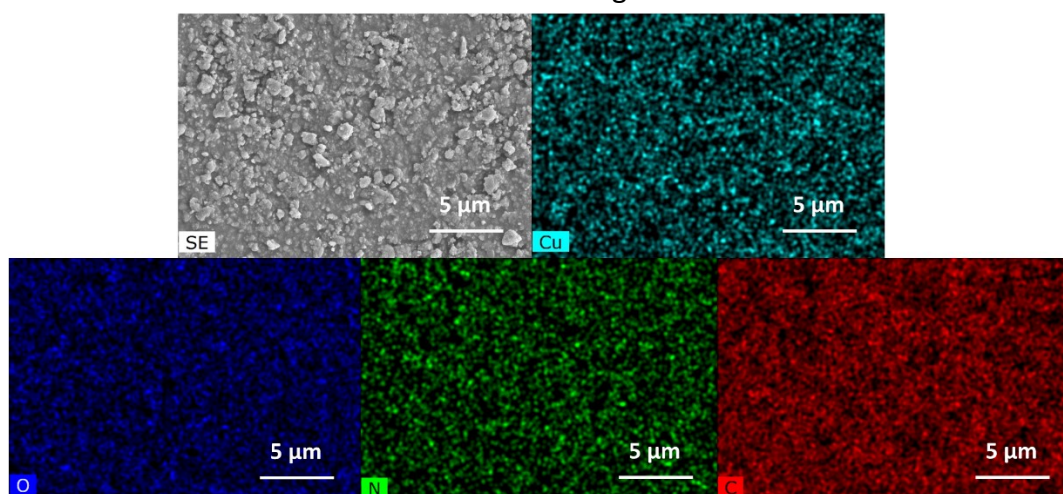

**Fig. S24** SEM-EDS mapping analysis image of ground powder of ZUT-iMOF-1(Cu) after testing.

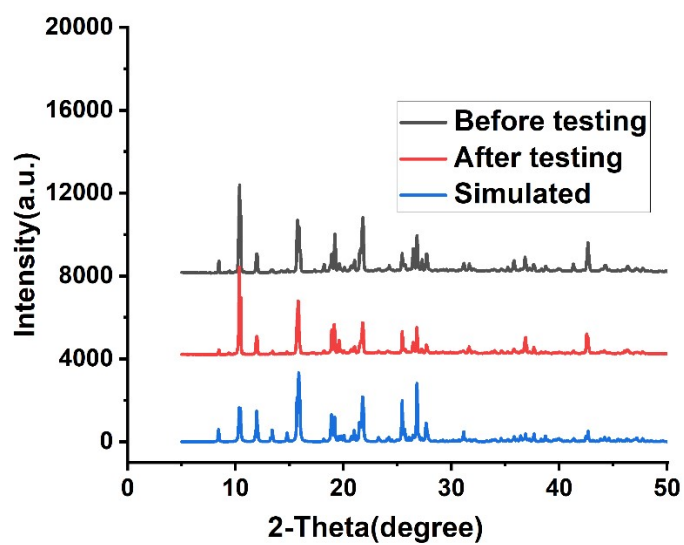

**Fig. S25** PXRD spectra of ZUT-iMOF-1(Cu) before and after testing.

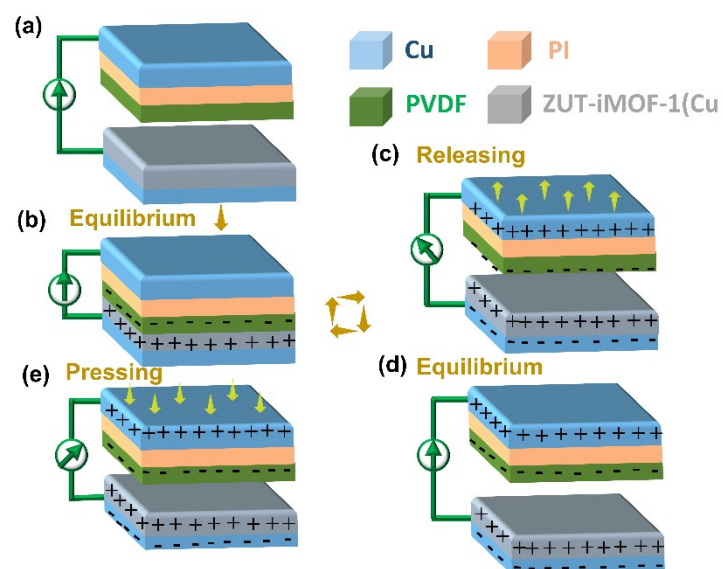

Fig. S26 Working mechanism of TENG based on iMOF-TENG.

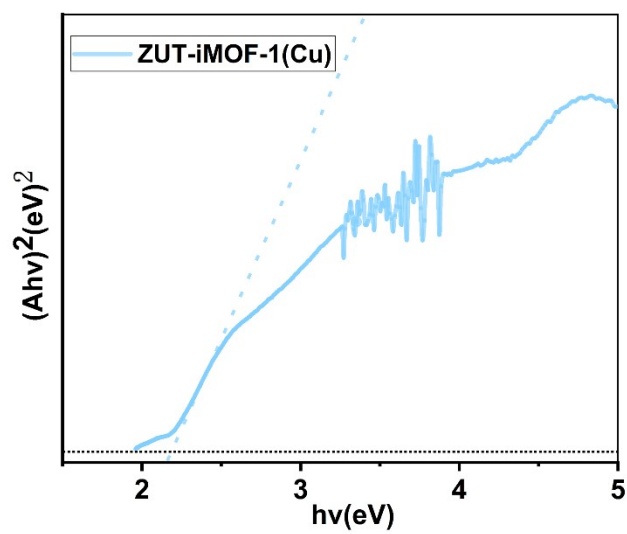

Fig. S27 Tauc plots of ZUT-iMOF-1(Cu).

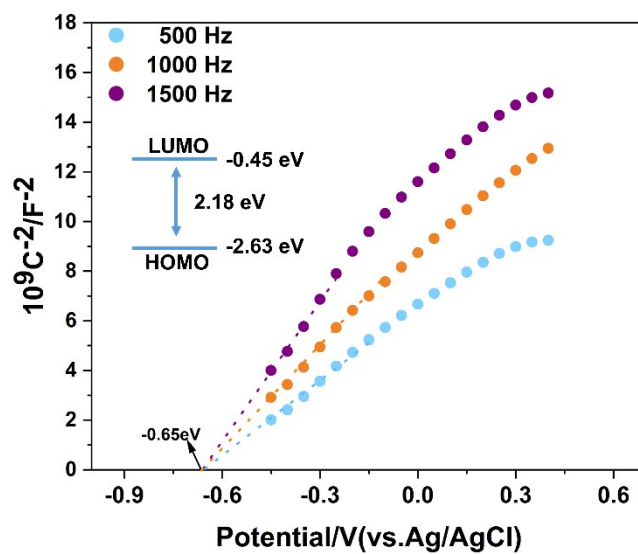

Fig. S28 Mott-Schottky plots of ZUT-iMOF-1(Cu).

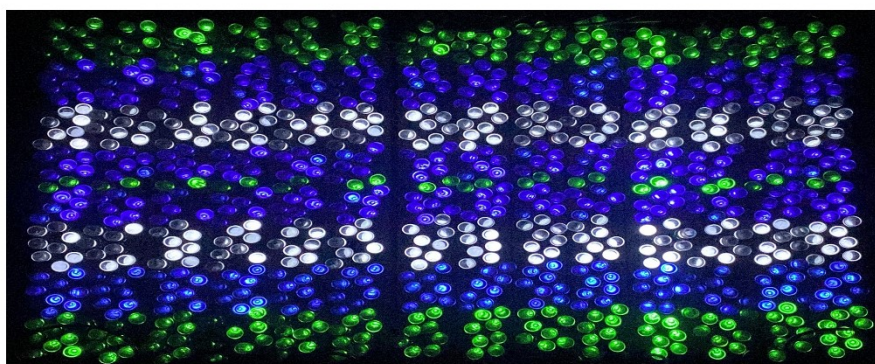

Fig. S29 Commercial LED lights lited by iMOF-TENG.

**Table S1** Crystallographic data and structure refinement details for ZUT-iMOF-1(Cu).

| Compound                                | ZUT-iMOF-1(Cu)                                                    |
|-----------------------------------------|-------------------------------------------------------------------|
| Formula                                 | C <sub>21</sub> H <sub>18</sub> CuN <sub>6</sub> O <sub>8.5</sub> |
| Mr                                      | 553.95                                                            |
| T/K                                     | 273.15                                                            |
| I (Mo–Ka)/Å                             | 0.71073                                                           |
| Crystalsyst                             | monoclinic                                                        |
| Space group                             | P2 <sub>1</sub> /n                                                |
| a/Å                                     | 10.3397(6)                                                        |
| b/Å                                     | 14.6943(8)                                                        |
| c/Å                                     | 14.9974(8)                                                        |
| α/°                                     | 90                                                                |
| β/°                                     | 90.685(2)                                                         |
| γ/°                                     | 90                                                                |
| Volume/Å <sup>3</sup>                   | 2278.5(2)                                                         |
| Z                                       | 4                                                                 |
| ρ <sub>calc</sub> (g cm <sup>-3</sup> ) | 1.615                                                             |
| F(000)                                  | 1132.0                                                            |
| μ(mm <sup>-1</sup> )                    | 1.023                                                             |
| R <sub>1</sub> (I ≥ 2σ(I))              | 0.0375                                                            |
| wR <sub>2</sub> (I > 2σ(I))             | 0.1070                                                            |

$R = [\sum || F_0 | - | F_d | | / \sum | F_0 | ], R_w = \sum_w [ | F_0^2 - F_c^2 |^2 / \sum_w ( | F_w |^2 )^2]^{1/2}$



**Table S2** Selected bond lengths (Å) and bond angles (deg) for ZUT-iMOF-1(Cu). crystal structure description.

| ZUT-iMOF-1(Cu)                                                                                                    |            |                                            |          |
|-------------------------------------------------------------------------------------------------------------------|------------|--------------------------------------------|----------|
| Cu01-O002                                                                                                         | 1.9801(17) | C00C-C00I                                  | 1.379(3) |
| Cu01-O003                                                                                                         | 2.0007(18) | C00C-C00N                                  | 1.521(3) |
| Cu01-O0041                                                                                                        | 2.2238(18) | C00E-C00F                                  | 1.508(3) |
| Cu01-N0082                                                                                                        | 2.014(2)   | C00F-C00H                                  | 1.374(3) |
| Cu01-N009                                                                                                         | 2.013(2)   | C00F-C00I                                  | 1.387(3) |
| O002-C00E                                                                                                         | 1.268(3)   | C00G-C00P                                  | 1.512(4) |
| O004-C00N                                                                                                         | 1.248(3)   | C00G-C00Q                                  | 1.389(4) |
| O003-Cu01-O002                                                                                                    | 90.51(7)   | C00I-C00F-C00E                             | 119.4(2) |
| O0041-Cu01-O002                                                                                                   | 99.34(7)   | C00I-C00F-C00H                             | 119.0(2) |
| O0041-Cu01-O003                                                                                                   | 91.67(7)   | C00Q-C00G-C00P                             | 119.7(3) |
| N0082-Cu01-O002                                                                                                   | 163.17(8)  | C00R-C00G-C00P                             | 121.4(2) |
| N0082-Cu01-O003                                                                                                   | 86.37(8)   | C00R-C00G-C00Q                             | 118.8(2) |
| N0082-Cu01-O0041                                                                                                  | 97.28(8)   | C00F-C00H-N006                             | 120.4(2) |
| N009-Cu01-O002                                                                                                    | 92.33(8)   | C00F-C00I-C00C                             | 120.0(2) |
| N009-Cu01-O003                                                                                                    | 172.38(8)  | C00O-C00J-N008                             | 123.0(3) |
| N009-Cu01-O0041                                                                                                   | 94.83(8)   | C00T-C00K-N00A                             | 116.2(3) |
| N009-Cu01-N0082                                                                                                   | 88.87(9)   | C00U-C00K-N00A                             | 124.7(3) |
| <sup>1</sup> -1/2+X,3/2-Y,-1/2+Z; <sup>2</sup> 1/2+X,1/2-Y,-1/2+Z; <sup>3</sup> 1/2+X,3/2-Y,1/2+Z; <sup>4</sup> - |            |                                            |          |
| Symmetry codes:                                                                                                   |            | 1/2+X,1/2-Y,1/2+Z; <sup>5</sup> -X,2-Y,1-Z |          |

**Table S3** Electrochemical parameters of carbon steel obtained from polarization curves with and without TENG.

|              | $E_{\text{corr}}$<br>(V (vs. SCE)) | $I_{\text{corr}}$<br>( $\mu\text{A}$ ) | $-\beta_c$<br>(mV dec <sup>-1</sup> ) | $\beta_a$<br>(mV dec <sup>-1</sup> ) |
|--------------|------------------------------------|----------------------------------------|---------------------------------------|--------------------------------------|
| With TENG    | -0.755                             | 80.39                                  | 188.53                                | 201.04                               |
| Without TENG | -0.646                             | 58.28                                  | 196.15                                | 198.09                               |

**Table S4** Resistance fitting parameters of carbon steel with and without TENG.

|              | $R_s(\Omega)$ | Q                                  |       | $R_{\text{ct}}(\text{k}\Omega)$ |
|--------------|---------------|------------------------------------|-------|---------------------------------|
|              |               | $Y(\text{s sec}^n \times 10^{-5})$ | n     |                                 |
| With TENG    | 554.8         | 1.608                              | 0.965 | 18.519                          |
| Without TENG | 562.2         | 1.7549                             | 0.911 | 20.483                          |

**Table S5** Output performance comparison of different materials-based TENGs.

| Positive materials    | Negative materials            | Current( $I_{\text{sc}}$ )            | Voltage( $V_0$ ) | Ref.             |
|-----------------------|-------------------------------|---------------------------------------|------------------|------------------|
| TFP-DP-COF            | PVDF                          | 47.9 $\mu\text{A}$                    | 815V             | 5                |
| Cd-MOF                | PVDF                          | 55.32 $\mu\text{A}$                   | 451.8 V          | 6                |
| ZIF-62                | Teflon/Kapton/Ethyl cellulose | 1.4 $\mu\text{A}$                     | 62 V             | 46               |
| ZUT-8                 | PVDF                          | 76.81 $\mu\text{A}$                   | 562.78 V         | 24               |
| ZIF-8                 | Kapton                        | 7 $\mu\text{A}$                       | 164 V            | 34               |
| Uio-66                | Acrylic Substrate             | 0.3 $\mu\text{A}$                     | 17.5 V           | 32               |
| Uio-66-4F             | Al                            | 30.6 $\mu\text{A}$                    | 937.4 V          | 35               |
| Cu-coated-CFP         | PVDF-coated-CFP               | 7.5 $\mu\text{A}$                     | 180 V            | 47               |
| ZnAl                  | PVDF                          | 5.6 $\mu\text{A}$                     | 230.6V           | 48               |
| TPB-DBBA-COF          | PVDF                          | 43.6 $\mu\text{A}$                    | 416V             | 49               |
| <b>ZUT-iMOF-1(Cu)</b> | <b>PVDF</b>                   | <b>73.79 <math>\mu\text{A}</math></b> | <b>491.45 V</b>  | <b>This work</b> |
